# Supplementary material
Source: PubMed Central journal article supplement (PMC10423036)
Supplement: NIHMS1919836-supplement-supplementary_data.pdf [file NIHMS1919836-supplement-supplementary_data.pdf]

| Figure       | Classification here | Age | Sex | Smoking | Mutation                 | Size   | Histology                                                                                                                   |
|--------------|---------------------|-----|-----|---------|--------------------------|--------|-----------------------------------------------------------------------------------------------------------------------------|
| 4a, 4d, 4e   | Lepidic             | 74  | F   | NS      | EGFR L858R               | 3.2 cm | Invasive well-differentiated adenocarcinoma arising within a background of fibroelastosis, 60% acinar, 40% lepidic          |
| 4a, 4c, ED1b | Lepidic             | 73  | M   | 50 PY   | KRAS G12C, NF1, NF2      | 1.4 cm | Papillary and lepidic, mucinous and non-mucinous, additional foci of AAH                                                    |
| 4a, 4e       | Lepidic             | 77  | F   | NS      | EGFR L858R, TP53, KDR    | 2.4 cm | Invasive, well-differentiated adenocarcinoma 75% acinar, 15% Papillary, 10% lepidic                                         |
| 4a           | Lepidic             | 67  | M   | 7.5 PY  | EGFR Exon 19 del         | 2.0 cm | Invasive, well-differentiated adenocarcinoma 70% acinar, 15% micropapillary, 10% papillary, and 5% lepidic                  |
| 4a, 4c       | Lepidic             | 75  | F   | 15 PY   | EGFR Exon 19 del         | 2.7 cm | Invasive, well-differentiated adenocarcinoma 50% acinar, 30% papillary, 15% lepidic, and 5% micropapillary                  |
| ED3b         | Lepidic             | 65  | M   | NS      | EGFR L858R               | 2.0 cm | Invasive well differentiated adenocarcinoma, 55% lepidic and 45% acinar                                                     |
| 4a           | Non-Lepidic         | 67  | M   | 35 PY   | CDH1, STK11, TP53        | 1.8 cm | Invasive poorly differentiated adenocarcinoma                                                                               |
| 4a           | Non-Lepidic         | 80  | M   | 50 PY   | NF1, TP53, MET           | 2.2 cm | Invasive poorly differentiated adenocarcinoma                                                                               |
| 4a           | Non-Lepidic         | 74  | M   | 50 PY   | ARID1A, KEAP1, NF1, TP53 | 5.0 cm | moderately differentiated adenocarcinoma with papillary (50%), micropapillary, (10%), solid (20%) and acinar (20%) patterns |
| 4a           | Non-Lepidic         | 76  | M   | Yes     | MAPK21                   | 3.7 cm | Invasive adenocarcinoma, solid predominant                                                                                  |
| 4a           | Non-Lepidic         | 78  | F   | NS      | EGFR exon19 deletion     | 4.5 cm | well-differentiated adenocarcinoma, 60% papillary, 20% micropapillary, 20% acinar                                           |
| ED1b, ED3a   | Non-Lepidic         | 77  | M   | 75 PY   | NF1, NKX2-1, PTEN        | 4.4 cm | mixed mucinous and pleomorphic/spindle cell carcinoma                                                                       |
| ED3a         | Non-Lepidic         | 75  | M   | NS      | KRAS G12D, NKX2-1        | 6.9 cm | invasive mucinous adenocarcinoma                                                                                            |

| Strunz et al 2020                                       | Kobayashi et al 2020                             | Choi et al 2020                                 | Marjanovic et al 2020      |
|---------------------------------------------------------|--------------------------------------------------|-------------------------------------------------|----------------------------|
| Krt8+ Alveolar Differentiation Intermediate (Krt8+ ADI) | Pre-alveolar type-1 transition cell state (PATs) | Damage Associated Transient Progenitors (DATPs) | High Plasticity Cell State |
| Cldn4                                                   | Cldn4                                            | Cldn4                                           | Cldn4                      |
| Krt8                                                    | Lgals3                                           | Krt8                                            | Lgals3                     |
| Itgb6                                                   | Fn1                                              | Sprr1a                                          | Scl4a11                    |
| Sprr1a                                                  | Trp53                                            | Tnip3                                           | Epcam                      |
| Tnip3                                                   | Krt19                                            | Cdkn1a                                          | Cldn7                      |
| Cdkn1a                                                  | Sfn                                              | Ly6a                                            | Cars                       |
| Plaur                                                   | Ctgf                                             | S100a14                                         | Hmces                      |
| Hbegf                                                   | Sox4                                             | Cxcl15                                          | Dusp10                     |
| Areg                                                    |                                                  | Ndr1                                            | Lif                        |
| Edn1                                                    |                                                  | Krt19                                           | Tigit                      |

| Wnt related driver mutation data from Caso et al 2020. |        |                                                  |                         |                |                                |                                   |
|--------------------------------------------------------|--------|--------------------------------------------------|-------------------------|----------------|--------------------------------|-----------------------------------|
| Accessed through www.cbioportal.org                    |        | "Lung Adenocarcinoma (MSK, J Thorac Oncol 2020)" |                         |                |                                |                                   |
| Sample                                                 | Gene   | Variant                                          | OncoKB annotation       | Net Wnt Effect | Predominant Histologic Subtype | Classification in this manuscript |
| P-0019612                                              | CTNNB1 | D32G                                             | Gain-of-function        | Augmentation   | Papillary                      | Non-Lepidic                       |
| P-0022830                                              | CTNNB1 | D32N                                             | Gain-of-function        | Augmentation   | Micropapillary                 | Non-Lepidic                       |
| P-0028486                                              | CTNNB1 | D32V                                             | Likely Gain-of-function | Augmentation   | Acinar                         | Non-Lepidic                       |
| P-0036267                                              | CTNNB1 | D32Y                                             | Gain-of-function        | Augmentation   | Acinar                         | Non-Lepidic                       |
| P-0005198                                              | CTNNB1 | S33P                                             | Likely Gain-of-function | Augmentation   | Papillary                      | Non-Lepidic                       |
| P-0014502                                              | CTNNB1 | G34E                                             | Likely Gain-of-function | Augmentation   | Acinar                         | Non-Lepidic                       |
| P-0029396                                              | CTNNB1 | G34R                                             | Likely Gain-of-function | Augmentation   | Papillary                      | Non-Lepidic                       |
| P-0008957                                              | CTNNB1 | G34R                                             | Likely Gain-of-function | Augmentation   | Acinar                         | Non-Lepidic                       |
| P-0003489                                              | CTNNB1 | S37F                                             | Gain-of-function        | Augmentation   | Acinar                         | Non-Lepidic                       |
| P-0017437                                              | CTNNB1 | S37F                                             | Gain-of-function        | Augmentation   | Acinar                         | Non-Lepidic                       |
| P-0033508                                              | CTNNB1 | S37F                                             | Gain-of-function        | Augmentation   | Acinar                         | Non-Lepidic                       |
| P-0036267                                              | CTNNB1 | S37F                                             | Gain-of-function        | Augmentation   | Acinar                         | Non-Lepidic                       |
| P-0023153                                              | CTNNB1 | S45P                                             | Gain-of-function        | Augmentation   | Micropapillary                 | Non-Lepidic                       |
| P-0014089                                              | CTNNB1 | S45P                                             | Gain-of-function        | Augmentation   | Acinar                         | Non-Lepidic                       |
| P-0010507                                              | CTNNB1 | N387K                                            | Gain-of-function        | Augmentation   | Acinar                         | Non-Lepidic                       |
| P-0029357                                              | AMER1  | R586*                                            | Likely Loss-of-function | Augmentation   | Acinar                         | Non-Lepidic                       |
| P-0007638                                              | AMER1  | W695_R696delins*                                 | Likely Loss-of-function | Augmentation   | Micropapillary                 | Non-Lepidic                       |
| P-0021718                                              | AMER1  | E702*                                            | Likely Loss-of-function | Augmentation   | Acinar                         | Non-Lepidic                       |
| P-0004860                                              | AMER1  | E752*                                            | Likely Loss-of-function | Augmentation   | Acinar                         | Non-Lepidic                       |
| P-0025918                                              | AMER1  | E920*                                            | Likely Loss-of-function | Augmentation   | Acinar                         | Non-Lepidic                       |
| P-0009312                                              | APC    | X278_splice                                      | Likely Loss-of-function | Augmentation   | Acinar                         | Non-Lepidic                       |
| P-0029294                                              | APC    | S1068*                                           | Likely Loss-of-function | Augmentation   | Acinar                         | Non-Lepidic                       |
| P-0029294                                              | APC    | E1097*                                           | Likely Loss-of-function | Augmentation   | Acinar                         | Non-Lepidic                       |
| P-0015862                                              | APC    | E1149*                                           | Likely Loss-of-function | Augmentation   | Solid                          | Non-Lepidic                       |
| P-0026187                                              | APC    | S1346*                                           | Likely Loss-of-function | Augmentation   | Solid                          | Non-Lepidic                       |
| P-0016172                                              | APC    | R1450*                                           | Likely Loss-of-function | Augmentation   | Acinar                         | Non-Lepidic                       |
| P-0016036                                              | APC    | S1465Wfs*3                                       | Likely Loss-of-function | Augmentation   | Acinar                         | Non-Lepidic                       |
| P-0022251                                              | APC    | P2094Lfs*18                                      | Likely Loss-of-function | Augmentation   | Solid                          | Non-Lepidic                       |
| P-0019612                                              | AXIN1  | Y237*                                            | Likely Loss-of-function | Augmentation   | Papillary                      | Non-Lepidic                       |
| P-0012540                                              | AXIN2  | X746_splice                                      | Likely Loss-of-function | Augmentation   | Solid                          | Non-Lepidic                       |
| P-0026688                                              | AXIN2  | K508lfs*181                                      | Likely Loss-of-function | Augmentation   | Papillary                      | Non-Lepidic                       |
